# Supplementary material for: A universal strategy for AAV delivery of base editors to correct genetic point mutations in neonatal PKU mice
Source: PubMed Central journal article supplement (PMC8803597; doi:10.1016/j.omtm.2022.01.001), 2022-01-07
Supplement: mmc1.pdf [file mmc1.pdf]

**OMTM, Volume 24**

**Supplemental information**

**A universal strategy for AAV delivery  
of base editors to correct genetic  
point mutations in neonatal PKU mice**

**Lifang Zhou, Jing Su, Jie Long, Rui Tao, Wenling Tang, Fengming Qin, Nan Liu, Yanhong Wang, Yaoge Jiao, Yun Hu, Lurong Jiang, Li Li, Yang Yang, and Shaohua Yao**

## Supplementary information

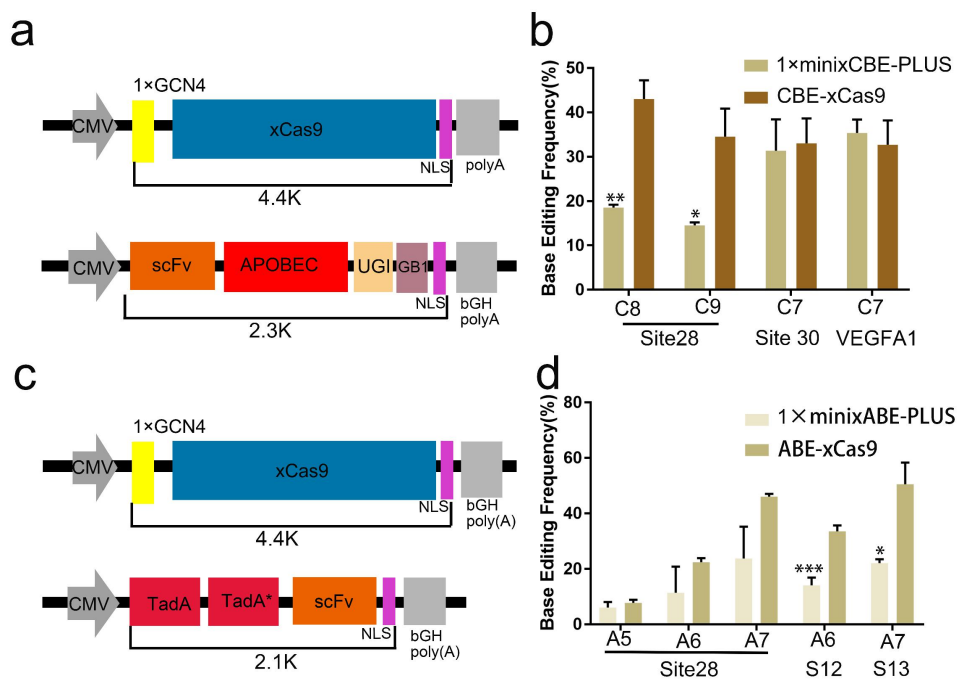

**Figure S1. Construction and verification of minixBE-PLUS editing system.** (a) Schematic diagram showing the expression cassettes of pCMV-1×GCN4-xCas9, CMV-scFv-CBE. (b) Cytosine base editing of 1×minixCBE-PLUS and CBE-xCas9 at three genomic loci in HEK293T cells. (n = 3 independent experiments). Values represent mean ± SD. Asterisks indicate statistically significant differences in editing efficiencies observed between CBE-xCas9 and 1×minixCBE-PLUS at each site. (c) Schematic diagram showing the expression cassettes of pCMV-1×GCN4-xCas9, pCMV-ABE-scFv. (d) Adenine base editing of 1×minixABE-PLUS and ABE-xCas9 at three genomic loci in HEK293T cells. (n = 3 independent experiments). Values represent mean ± SD. Asterisks indicate statistically significant differences in editing efficiencies observed between ABE-xCas9 and 1×minixABE-PLUS at each site. (abbreviations, CMV(human cytomegalovirus promoter), UGI(Uracil DNA

glycosylase inhibitor), NLS (nuclear localization signal), GB1(G protein B1 domain))

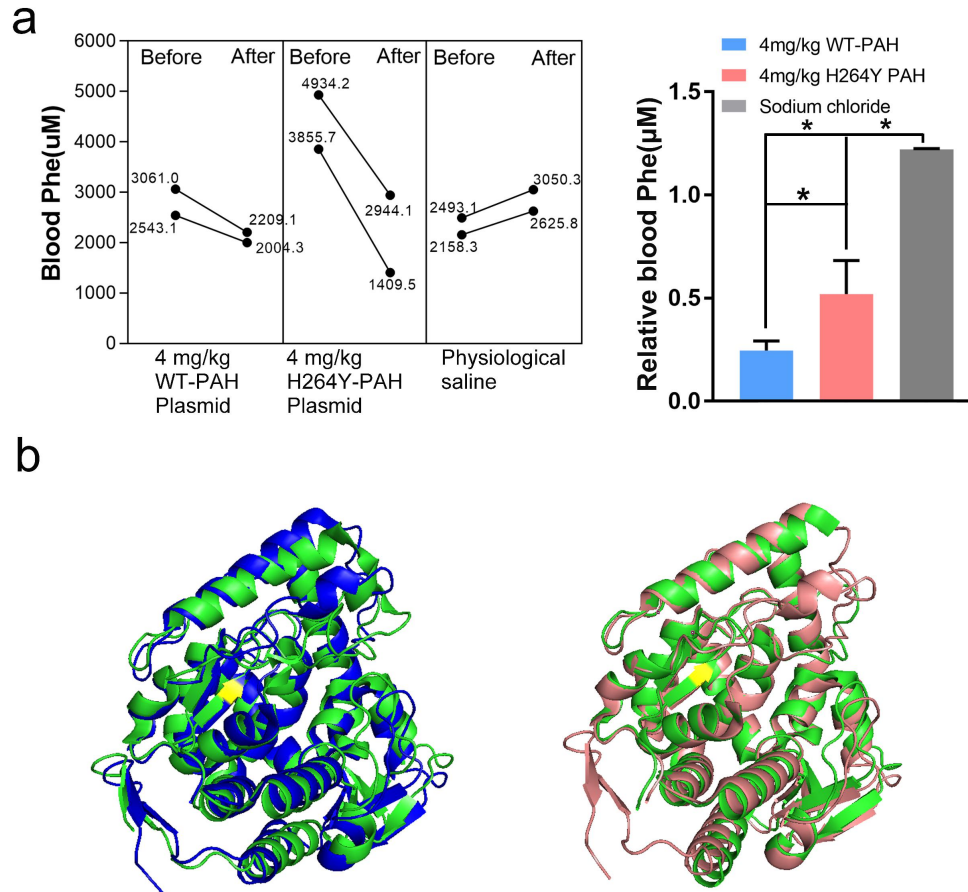

**Figure S2. PAH activity evaluation.** (a) H264Y-Pah enzyme activity verification.

Changes of blood Phe in mice after plasmid injection (left panel). The relative changes of Phe in mice blood after plasmid injection (right panel) (n = 2 or 3 independent experiments). Values represent mean  $\pm$  SD. Asterisks indicate statistically significant differences in functional editing efficiencies observed between WT-PAH or H254Y-PAH plasmid injected mice and sodium chloride injected mice.

(b) Comparison of protein structure between phenylalanine hydroxylase monomer (PDB, 6hpo) (green) and tyrosine hydroxylase monomer (blue) (PDB, 3hfb), or

tryptophan hydroxylase monomer (pink) (PDB, 13e2t). position F264 of phenylalanine hydroxylase is marked in yellow.

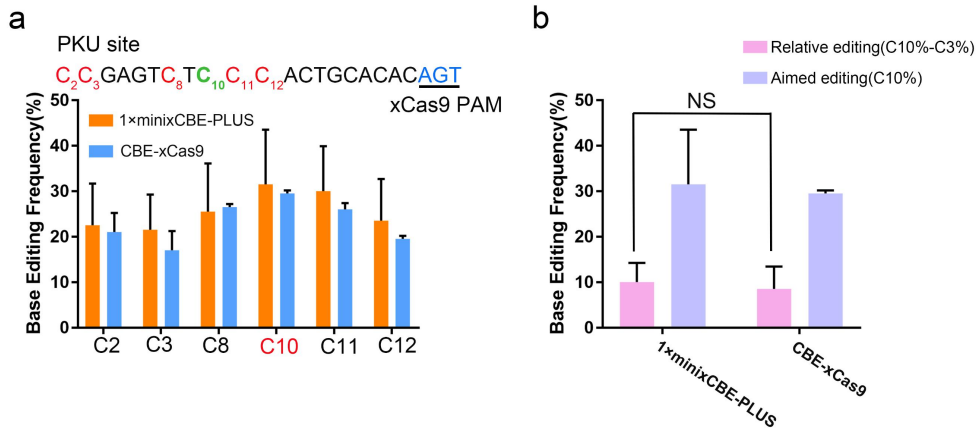

**Figure S3. *In vitro* base editing of mouse PKU site by 1xminixCBE-PLUS.** (a) The editing of 1xminixCBE-PLUS, and CBE-xCas9 with the sgRNA on PKU site of each c (n = 3 independent experiments). The aimed cytosine (C10, i.e. C835) was shown in green, and the bystanders were shown in red. (b) The relative editing efficiency (C10%-C3%) of 1xminixCBE-PLUS, and CBE-xCas9 (n = 3 independent experiments). Values represent mean  $\pm$  SD. Asterisks indicate statistically significant differences in functional editing efficiencies observed between CBE-xCas9 and 1xminixCBE-PLUS at PKU site .



**Figure 4e and Figure 4f.** Asterisks indicate statistically significant differences in the level and weigh of tested mice between multiple groups.

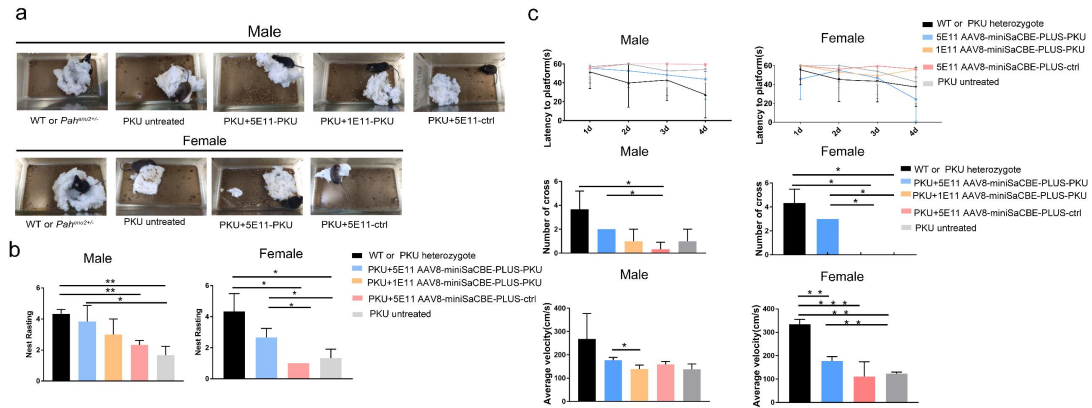

**Figure S6. Behavioral analysis.** (a) Photos of male and female mice' nesting situation. (b) Rating assessment of mice's nesting ability. n=3 mice for each group. Values represent mean  $\pm$  SD. Asterisks indicate statistically significant differences between each group. (c) Performance in the water maze is presented with male and female respectively. The results are shown in top latency to the target platform (seconds), middle number of crosses, bottom average velocity (cm/s). n=3 mice for each group. Values represent mean  $\pm$  SD. Asterisks indicate statistically significant differences between each group.

**Table S1. List of sgRNAs and Oligos sequence**

| sgRNA             | target sequence                                          | Oligo F                             | Oligo R                         |
|-------------------|----------------------------------------------------------|-------------------------------------|---------------------------------|
| FANCF<br>site1    | GATGTTCCAAT<br>CAGTACGCA<br><b>GAGAGT</b>                | CACCGATGTTCC<br>AATCAGTACGCA        | AAACTGCGTACTGAT<br>TGGAACATC    |
| CYP4V2<br>site4   | TGCCTTAGATA<br>TCATCTGTG<br><b>GAGAAT</b>                | CACCGTGCCTTA<br>GATATCATCTGT<br>G   | AAACCACAGATGATA<br>TCTAAGGCAC   |
| HEK3-1            | TCTGCTTCTCCA<br>GCCCTGGC<br><b>CTGGGT</b>                | CACCGTCTGCTT<br>CTCCAGCCCTGG<br>C   | AAACGCCAGGGCTGG<br>AGAAGCAGAC   |
| HEK293<br>site4-4 | CTTTAACCCCC<br>ACCTCCAGC<br><b>CGCAGT</b>                | CACCGCTTTAAC<br>CCCCACCTCCAG<br>C   | AAACGCTGGAGGTGG<br>GGGTAAAGC    |
| EMX1              | CCTCCCTCCCTG<br>GCCCAGGT<br><b>GAAGGT</b>                | CACCGCCTCCCT<br>CCCTGGCCCAGG<br>T   | AAACACCTGGGCCAG<br>GGAGGGAGGC   |
| FANCF<br>site2    | GCCGTCTCCAA<br>GGTGAAAGC<br><b>GGAAGT</b>                | CACCGCCGTCTC<br>CAAGGTGAAAGC        | AAACGCTTTCACCTTG<br>GAGACGGC    |
| Sa site6          | GATGTTCCAAT<br>CAGTACGCA<br><b>GAGAGT</b>                | CACCGATGTTCC<br>AATCAGTACGCA        | AAACTGCGTACTGAT<br>TGGAACATCC   |
| VEGFA<br>site11   | GCTCCATTCAC<br>CCAGCTTCCC<br><b>TGTGGT</b>               | CACCGCTCCATT<br>CACCCAGCTTCC<br>C   | AAACGGGAAGCTGGG<br>TGAATGGAGC   |
| RUNX1<br>4        | GTA <del>T</del> CACCTCT<br>CATGAAGCACT<br><b>GTGGGT</b> | CACCGTACTCAC<br>CTCTCATGAAGC<br>ACT | AAACAGTGCTTCATG<br>AGAGGTGAGTAC |
| EMX1<br>#6        | GCAACCACAAA<br>CCCACGAGGG<br><b>CAGAGT</b>               | CACCGCAACCAC<br>AAACCCACGAGG<br>G   | AAACCCCTCGTGGGT<br>TTGTGGTTGC   |
| Sa site1          | CTGAATAGCTG<br>CAAACAAGTG<br><b>CAGAAT</b>               | CACCGCTGAATA<br>GCTGCAAACAAG<br>TG  | AAACCACTTGTTTGCA<br>GCTATTCAGC  |
| Sa site11         | GCTGTTGCATG<br>AGGAAAGGGAC<br><b>TAGAGT</b>              | CACCGCTGTTGC<br>ATGAGGAAAGG<br>GAC  | AAACGTCCCTTTCCTC<br>ATGCAACAGC  |
| Site28            | GACAAACCAGA<br>AGCCGCTCC<br><b>TGG</b>                   | CACCGACAAACC<br>AGAAGCCGCTCC        | AAACGGAGCGGCTTC<br>TGGTTTGTCC   |
| Site30            | GAACACAAAGC<br>ATAGACTGC<br><b>GGG</b>                   | CACCGAACACAA<br>AGCATAGACTGC        | AAACGCAGTCTATGC<br>TTTGTGTTCC   |

|                  |                                            |                                    |                               |
|------------------|--------------------------------------------|------------------------------------|-------------------------------|
| VEGFA<br>1       | GATGTCTGCAG<br>GCCAGATGA<br><b>GGG</b>     | CACCGATGTCTG<br>CAGGCCAGATGA       | AAACTCATCTGGCCT<br>GCAGACATC  |
| S12              | GCAGACGGCAG<br>TCACTAGGG<br><b>GGC</b>     | CACCGCAGACGG<br>CAGTCACTAGGG       | AAACCCCTAGTGACT<br>GCCGTCTGC  |
| S13              | GTCGCAGGACA<br>GCTTTTCCT<br><b>AGA</b>     | CACCGTCGCAGG<br>ACAGCTTTTCCT       | AAACAGGAAAAGCTG<br>TCCTGCGAC  |
| 18-PKU-<br>sgRNA | TCCGAGTCTCC<br>CACTGCA<br><b>CACAGT</b>    | CACCGTCCGAGT<br>CTTCCACTGCA        | AAACTGCAGGGGAAG<br>ACTGGAC    |
| 19-PKU-<br>sgRNA | TTCCGAGTCTCC<br>CACTGCA<br><b>CACAGT</b>   | CACCGTTCCGAG<br>TCTTCCACTGCA       | AAACTGCAGGGGAAG<br>ACTGGAAC   |
| 20-PKU-<br>sgRNA | CTTCCGAGTCTC<br>CCACTGCA<br><b>CACAGT</b>  | CACCGCTTCCGA<br>GTCTTCCACTGC<br>A  | AAACTGCAGGGGAAG<br>ACTGGAAGC  |
| 21-PKU-<br>sgRNA | CCTTCCGAGTCT<br>TCCACTGCA<br><b>CACAGT</b> | CACCGCCTTCCG<br>AGTCTTCCACTG<br>CA | AAACTGCAGTGGAAG<br>ACTGGAAGGC |

**Table S2. Primers used to amplify each target regions for sanger sequencing**

| Target site       | chro<br>m | Forward primer           | Reverse primer           |
|-------------------|-----------|--------------------------|--------------------------|
| FANCF site1       | Chr1<br>1 | CGACGAGACAAAGGCG<br>GCT  | TCACTGTGACGTCCTGCT<br>CT |
| CYP4V2<br>site4   | Chr4      | TGAAGAAACTTCGGTAT<br>CTG | TATGGAAGCCCATGCAG<br>GCG |
| HEK3-1            | Chr9      | AGAATGGGTCACAGTG<br>GCAA | TAGGAAAAGCTGTCCTG<br>CGA |
| HEK293<br>site4-4 | Chr2<br>0 | CTGCTGAGGGCGGCTTC<br>TC  | TGAAATCGCTCGGAGCC<br>TC  |
| EMX1              | Chr2      | TCTCTCTGGCCCACTGT<br>GTC | CCATTGGCCTGCTTCGTG       |
| FANCF site2       | Chr1<br>1 | CGACGAGACAAAGGCG<br>GCT  | TCACTGTGACGTCCTGCT<br>CT |
| Sa site6          | Chr1<br>1 | ATGACTGGCATCATCTC<br>GCA | GGTGCTGACGTAGGTAG<br>TGC |
| VEGFA11           | Chr6      | GGAACAAGGGCCTCTGT<br>CTG | GCCGTTCCCTCTTTGCTA<br>GG |
| RUNX14            | Chr2      | GTTCTCACGCACCGACT        | GAGTCCCAGAGGTATCC        |



|                       |      |                           |                           |
|-----------------------|------|---------------------------|---------------------------|
|                       | 1    | GAA                       | AGC                       |
| EMX1 #6               | Chr2 | TCTCTCTGGCCCACTGT<br>GTC  | CCATTGGCCTGCTTCGTG        |
| Sa site1              | Chr5 | AAGTTACTGCAGCCCAA<br>G    | CAAGCAGGTGATTACAG<br>G    |
| Sa site11             | Chr1 | GCAGAAACCACAGTGT<br>GT    | CACTACCCCTGTTCTTAA<br>AG  |
| Site28                | Chr3 | GGCACAAAGGATGAAG<br>GCT   | GCTCAGTCTTGCATGAA<br>ACAC |
| Site30                | Chr5 | ACAGGCTACCCCCTAAG<br>T    | TCCCAAGTGAGAAGCCA<br>GTG  |
| VEGFA site1           | Chr6 | GGAACAAGGGCCTCTGT<br>CTG  | GCCGTTCCCTCTTTGCTA<br>GG  |
| S12                   | Chr6 | CACAGCTTCCCCTTCTC<br>AGC  | AGGGACACACAGATCTA<br>TT   |
| S13                   | Chr9 | ATGTGGGCTGCCTAGAA<br>AGG  | CCCAGCCAAACTTGTC<br>ACC   |
| PKU-sgRNA             |      | CCTTGGGGAGTCATACC<br>TCA  | ATAAAGCAGGCAGTGGA<br>TCA  |
| BGH_PA_qP<br>CR       |      | GCCAGCCATCTGTTGT          | GGAGTGGCACCTTCCA          |
| BGH_PA_qP<br>CR_Probe |      | TCCCCCGTGCCTTCCTT<br>GACC |                           |

**Table S3. HTS Primers used for on-target sequence amplification.**

| Primer name         | Forward primer                    | Reverse primer |
|---------------------|-----------------------------------|----------------|
| 1-Bar-DNA-OT        | aagcgtg CCTTGGGGAGTCATACCTCA      | GTTCAGGTG      |
| 2-Bar-DNA-OT        | attctcg CCTTGGGGAGTCATACCTCA      | TGTACATGG      |
| 3-Bar-DNA-OT        | attgctc CCTTGGGGAGTCATACCTCA      |                |
| 4-Bar-DNA-OT        | atcaagc CCTTGGGGAGTCATACCTCA      |                |
| 5-Bar-DNA-OT        | atccgga CCTTGGGGAGTCATACCTCA      |                |
| 6-Bar-DNA-OT        | atcgaag CCTTGGGGAGTCATACCTCA<br>A |                |
| 7-Bar-DNA-OT        | atcgtcc CCTTGGGGAGTCATACCTCA      |                |
| 8-Bar-DNA-OT        | atgcttc CCTTGGGGAGTCATACCTCA      |                |
| 9-Bar-DNA-OT        | atggcga CCTTGGGGAGTCATACCTCA      |                |
| 10-Bar-DNA-OT       | acttagc CCTTGGGGAGTCATACCTCA      |                |
| S99-Bar-DNA-OT      | tgtgtca CCTTGGGGAGTCATACCTCA      |                |
| S38-Bar-DNA-OT      | caactgt CCTTGGGGAGTCATACCTCA      |                |
| 1-RNA-pku-ontargetF | catcgac GACAACATCCCGCAGCT         | GTTCAGGTG      |
| 2-RNA-pku-ontargetF | catgatc GACAACATCCCGCAGCT         | TGTACATGG      |
| 3-RNA-pku-ontargetF | catgcaa GACAACATCCCGCAGCT         |                |
| 4-RNA-pku-ontargetF | cagttac GACAACATCCCGCAGCT         |                |

|                      |                            |
|----------------------|----------------------------|
| 5-RNA-pku-ontargetF  | ctatggt GACAACATCCCCGCAGCT |
| 6-RNA-pku-ontargetF  | ctacaag GACAACATCCCCGCAGCT |
| 7-RNA-pku-ontargetF  | ctacgtc GACAACATCCCCGCAGCT |
| 8-RNA-pku-ontargetF  | ctagcac GACAACATCCCCGCAGCT |
| 9-RNA-pku-ontargetF  | cttagct GACAACATCCCCGCAGCT |
| 10-RNA-pku-ontargetF | ctgggag GACAACATCCCCGCAGCT |
| 11-RNA-pku-ontargetF | ctgctaa GACAACATCCCCGCAGCT |
| 12-RNA-pku-ontargetF | ctcgtat GACAACATCCCCGCAGCT |
| 13-RNA-pku-ontargetF | gaactac GACAACATCCCGCAGCT  |
| 14-RNA-pku-ontargetF | gaaccta GACAACATCCCCGCAGCT |
| 15-RNA-pku-ontargetF | gaaggtc GACAACATCCCCGCAGCT |
| 16-RNA-pku-ontargetF | gattctg GACAACATCCCCGCAGCT |
| 17-RNA-pku-ontargetF | gattgct GACAACATCCCCGCAGCT |
| 18-RNA-pku-ontargetF | gatgacg GACAACATCCCCGCAGCT |
| 19-RNA-pku-ontargetF | gatgtgc GACAACATCCCCGCAGCT |
| 20-RNA-pku-ontargetF | gaccatc GACAACATCCCCGCAGCT |
| 21-RNA-pku-ontargetF | gacgaat GACAACATCCCCGCAGCT |

**Table S4. Off-target sequence**

| Target site | sequence                    | chrom | strand |
|-------------|-----------------------------|-------|--------|
| OT1         | ACTTCAGACTCTCTCACTGCAACTGGT | Chr14 | -      |
| OT2         | ATTTCCAAGTCTCCCAGTGTGAGT    | Chr10 | +      |
| OT3         | CCTCCCCAGTCTCCCAGTGTGACAAT  | Chr11 | -      |
| OT4         | CCTACAGAGTATTCCACTGCACCCAGT | Chr10 | -      |
| OT5         | CCTTTCGAGTCTTTCAGTGCAGT     | Chr7  | -      |
| OT6         | TCTTCCTAGGCTCCCACAGCAATGAGT | Chr11 | -      |
| OT7         | CATTTCCAGTGTACCACTGCAGTCAGT | Chr4  | +      |
| OT8         | TCTTCAGAGTCTTCTCTGCATCCGAT  | ChrX  | +      |

**Table S5. Off-target Primers for amplification**

| off-target site | Forward primer                       | Reverse primer            |
|-----------------|--------------------------------------|---------------------------|
| OT1             | gctgtaa<br>GCATTTCTCAGATCTAATCTTCTGA | TGAGCATATGTGACCT<br>GAGGA |
| OT2             | gcctcta GAAACAGTTTGCACCCCCTA         | CCCCAGGTTTCATCAGT<br>TCAC |
| OT3             | gcgagtt CTTAGCGCCGCTGACTCT           | TCCCTCTCCTTTTGCTT<br>CCT  |
| OT4             | aactagg<br>GACTGCAATACTCACGGTTCC     | TGAGCCCAAGAGACTT<br>CCTG  |
| OT5             | aacctag<br>GCCATTTGATGAATGAATAGCA    | GGTTTTCCATCCGTCC<br>TGT   |

|     |                                  |                           |
|-----|----------------------------------|---------------------------|
| OT6 | aagatgc AGGATGAGACCCAGGACCA      | CCTGCAAGCTTTCCAC<br>TCAT  |
| OT7 | ctggatg<br>GCTGGGGCTATACAAAATTCC | CAGTAGTTCCAGTCAC<br>GGTTG |
| OT8 | ccaatga<br>AAAAATATGCCCGTGCATTG  | TGCTGCTGTTGGAATC<br>TGAG  |

**Note1 :**

Plasmid sequences (CDS)

4×GCN4-SaCas9KKH

**ATGGAGGAACTGCTGAGCAAGAACTACCACCTGGAAAACGAGGTGGCCA**  
**GACTGAAGAAAGGCTCTGGCTCTGGCGGAAGCGGTTCTGGCGGATCAGGA**  
**TCTGGAAGTGGCGGCTCTGGAAGCGGAGGTTCTGGATCTGGCGAAGAACT**  
**GCTGTCTAAGAATTATCACCTCGAGAACGAAGTGGCTCGGCTCAAGAAAG**  
**GCAGTGGCAGCGGAGGAAGTGGATCCGGCGGTAGTGGTAGTGGAAGCGG**  
**CGGATCCGGCTCAGGCGGATCTGGTTCAGGGGAAGAACTCCTCTCCAAA**  
**ACTACCATCTCGAGAATGAGGTCGCCCGCTGAAAAAAGGATCAGGTTCC**  
**GGTGGTTCTGGCAGCGGTGGTTCAGGCTCAGGCAGCGGCGGTAGCGGTAG**  
**CGGTGGAAGCGGAAGCGGAGAAGAACTTCTCAGCAAAAATTACCACTTG**  
**GAGAATGAAGTTGCAAGACTCAAAAAAGGTTCCGGCAGTGGCGGCAGCG**  
**GCAGCGGCGGATCTGGTAGTGGATCTGGTGGCAGTGGTTCAGGCGGAAGT**  
**GGTAGCGGACCCGGGACCTCAGAGTCCGCCACACCCGAAAGTGGGAAAC**  
**GGAACTACATCCTGGGGCTTGCCATTGGGATAACCAGCGTTGGCTACGGA**  
**ATTATTGATTATGAGACACGCGATGTGATTGACGCCGGGGTTAGGCTGTTT**  
**AAAGAGGCCAACGTTGAAAACAACGAGGGAAGACGGAGTAAGCGCGGA**  
**GCAAGAAGACTCAAGCGCAGACGGAGACATCGGATTCAGAGGGTGAAAA**  
**AGCTGCTCTTCGATTACAATCTCCTGACCGATCATAGTGAGCTGAGCGGA**  
**ATCAACCCCTACGAGGCGCGAGTGAAAGGGCTTTCCAGAAGCTGTCCGA**  
**AGAGGAGTTCTCCGCCGCGTTGCTGCACCTGGCCAAACGGAGGGGGGTTT**  
**ACAATGTAAACGAAGTGGAGGAGGACACGGGCAATGAACTTAGTACGAA**  
**AGAACAGATCAGTAGGAACTCTAAGGCTCTCGAAGAGAAATACGTCGCTG**  
**AGTTGCAGCTTGAGAGACTGAAAAAAGACGGCGAAGTACGCGGATCTATT**  
**AATAGGTTCAAGACTTCAGATTACGTAAAGGAAGCCAAGCAGCTCCTGAA**  
**AGTACAGAAAGCGTACCATCAGCTCGATCAGAGCTTCATCGATACCTACA**  
**TAGATTTGCTGGAGACACGGAGGACATACTACGAGGGCCCAGGGGAAGG**  
**ATCTCCTTTTGGGTGGAAGGACATCAAGGAATGGTACGAGATGCTTATGG**  
**GACATTGTACATATTTTCCGGAGGAGCTCAGGAGCGTCAAGTACGCCTAC**  
**AATGCCGACCTGTACAATGCCCTCAATGACCTCAATAACCTCGTGATTACC**  
**AGGGACGAGAACGAGAAGCTGGAGTACTATGAAAAGTTCCAGATTATCG**  
**AGAATGTGTTTAAGCAGAAGAAGAAGCCGACACTTAAGCAGATTGCAAA**  
**GGAAATCCTCGTGAATGAGGAAGATATCAAGGGATACAGAGTGACAAGT**  
**ACAGGCAAGCCCGAGTTCACAAATCTGAAGGTGTACCACGATATTAAGGA**  
**CATAACCGCACGAAAGGAGATAATCGAAAACGCTGAGCTCCTCGATCAG**

ATCGCAAAAATTCTTACCATCTACCAGTCTAGTGAGGACATTCAGGAGGA  
ACTGACTAATCTGAACAGTGAGCTCACCCAAGAGGAAATTGAGCAGATTT  
CAAACCTGAAAGGCTACACCGGGACGCACAATCTGAGCCTCAAAGCAATC  
AACCTCATTCTGGATGAACTTTGGCACACAAATGACAACCAAATTGCCAT  
ATTCAACCGCCTGAAACTGGTGCCAAAAAAGTGGATCTGTCACAGCAAA  
AGGAAATCCCTACAACCTTGGTTGACGATTTTATTCTGTCCCCCGTTGTCA  
AGCGGAGCTTCATCCAGTCAATCAAGGTGATCAATGCCATCATTAAAAAA  
TACGGATTGCCAAACGATATAATTATCGAGCTTGCACGAGAGAAGAACTC  
AAAGGACGCCCAGAAGATGATTAACGAAATGCAGAAGCGCAACCGCCAG  
ACAAACGAACGCATAGAGGAAATTATAAGAACAACCGGCAAAGAGAATG  
CCAAGTATCTGATCGAGAAAATCAAGCTGCACGACATGCAAGAAGGCAA  
GTGCCTGTACTCTCTGGAAGCTATCCCCTCGAAGATCTGCTGAATAATCC  
ATTCAATTACGAGGTGGACCACATCATCCCTAGATCCGTAAGCTTTGACA  
ATTCTTCAATAACAAAGTTCTGGTTAAACAGGAGGAAAATTCTAAAAAA  
GGGAACCGGACCCCGTTCCAGTACCTGAGCTCCAGTGACAGCAAGATTAG  
CTACGAGACTTTTAAGAAACATATTCTGAATCTGGCCAAAGGCAAAGGCA  
GGATCAGCAAGACCAAGAAGGAGTACCTCCTCGAAGAACGCGACATTA  
CAGATTTAGTGTGCAGAAAGATTTTCATCAACCGAAACCTTGTCGATACTC  
GGTACGCCACGAGAGGCCTGATGAATCTCCTCAGGAGCTACTTCCGCGTC  
AATAATCTGGACGTTAAAGTCAAGAGCATAAATGGGGGATTCACCAGCTT  
TCTGAGGAGAAAGTGGAAGTTTAAGAAGGAACGAAACAAAGGATACAAG  
CACCATGCTGAGGATGCTTTGATCATCGCTAACGCGGACTTTATCTTTAAG  
GAATGGAAAAAGCTGGATAAGGCAAAGAAAGTGATGGAAAACCAGATGT  
TCGAGGAGAAGCAGGCAGAGTCAATGCCTGAGATCGAGACAGAGCAGGA  
ATACAAGGAAATTTTCATCACCCCTCATCAGATTAACACATAAAGGACT  
TCAAAGACTATAAATACTCTCATAGGGTGGACAAAAAACCCAATCGCAAG  
CTCATTAAATGACACCCTGTACTCAACACGGAAGGATGATAAAGGTAATAC  
CTTGATTGTGAATAATCTTAATGGATTGTATGACAAAGATAACGACAAGC  
TCAAGAAGCTGATCAACAAGTCTCCAGAGAAGCTCCTTATGTATCACCCAC  
GACCCACAGACTTATCAGAAATTGAAACTGATCATGGAGCAATACGGGGA  
TGAGAAGAACCCTCTACAAATATTATGAGGAAACAGGTAATTACCTGA  
CCAAGTACTCCAAGAAGGATAACGGACCAGTGATCAAAAAGATAAAGTA  
CTATGGCAACAACTTAATGCGCATTTGGACATAACTGACGATTACCCCA  
ATTCTCGAAACAAGGTTGTGAAGCTCTCCCTGAAGCCTTATAGATTTGACG  
TGTACCTGGATAATGGGGTTTATAAATTCGTCACCGTGAAAAATCTGGAC  
GTGATCAAAAAGGAGAACTATTATGAAGTAAACTCAAAGTGCTATGAGGA  
GGCGAAGAAGCTGAAGAAGATCTCCAATCAGGCCGAGTTCATCGCTTCCT  
TCTATAAGAACGATCTCATCAAGATCAATGGAGAGCTTTATCGCGTCATT  
GGTGTGAACAATGACTTGCTGAACAGGATCGAAGTCAATATGATAGACAT  
TACCTACCGGGAGTATCTCGAAAACATGAATGATAAACGGCCGCCTCACA  
TCATCAAGACAATCGCATCTAAAACCTCAGTCAATAAAAAAGTACTCTACC  
GATATCCTGGGGAATCTCTATGAAGTGAAGTCAAAGAAGCACCCACAAAT  
CATTA AAAAAGGTGGATCCCCAAGAAGAAGAGGAAAGTCTCGAGCGAC  
TACAAAGACCATGACGGTGATTATAAAGATCATGACATCGATTACAAGGA

TGACGATGACAAGTCTGGTGGTTCTACTAATCTGTCAGATATTATTGAAAA  
GGAGACCGGTAAGCAACTGGTTATCCAGGAATCCATCCTCATGCTCCCAG  
AGGAGGTGGAAGAAGTCATTGGGAACAAGCCGGAAAGCGATATACTCGT  
GCACACCGCCTACGACGAGAGCACCGACGAGAATGTCATGCTTCTGACTA  
GCGACGCCCTGAATACAAGCCTTGGGCTCTGGTCATACAGGATAGCAAC  
GGTGAGAACAAGATTAAGATGCTCTCTGGTGGTTCTCCCAAGAAGAAGAG  
GAAAGTCTAA

2×GCN4-SaCas9KKH

**ATG**GAGGA**ACTGCTGAGCAAGA**ACTACCACCTGGAAAACGAGGTGGCCA  
GACTGAAGAAAGGCTCTGGCTCTGGCGGAAGCGGTTCTGGCGGATCAGGA  
TCTGGAAGTGGCGGCTCTGGAAGCGGAGGTTCTGGATCTGGCGAAGAACT  
GCTGTCTAAGAATTATCACCTCGAGAACGAAGTGGCTCGGCTCAAGAAAG  
GCAGTGGCAGCGGAGGAAGTGGATCCGGCGGTAGTGGTAGTGGAAGCGG  
CGGATCCGGCTCAGGCGGATCTGGTTCAGGGCCCGGGACCTCAGAGTCCG  
CCACACCCGAAAGTGGGAAACGGA**ACTACATCCTGGGGCTTGCCATTGGG**  
ATAACCAGCGTTGGCTACGGAATTATTGATTATGAGACACGCGATGTGAT  
TGACGCCGGGGTTAGGCTGTTCAAAGAGGCCAACGTTGAAAACAACGAG  
GGAAGACGGAGTAAGCGCGGAGCAAGAAGACTCAAGCGCAGACGGAGA  
CATCGGATTCAGAGGGTGAAAAAGCTGCTCTTCGATTACAATCTCCTGAC  
CGATCATAGTGAGCTGAGCGGAATCAACCCCTACGAGGCGCGAGTGAAA  
GGGCTTTCCAGAAGCTGTCCGAAGAGGAGTTCTCCGCCGCGTTGCTGCA  
CCTGGCCAAACGGAGGGGGGTT**CACAATGTAAACGAAGTGGAGGAGGAC**  
ACGGGCAATGAACTTAGTACGAAAGAACAGATCAGTAGGAACTCTAAGG  
CTCTCGAAGAGAAATACGTCGCTGAGTTGCAGCTTGAGAGACTGAAAAAA  
GACGGCGAAGTACGCGGATCTATTAATAGGTTCAAGACTTCAGATTACGT  
AAAGGAAGCCAAGCAGCTCCTGAAAGTACAGAAAGCGTACCATCAGCTC  
GATCAGAGCTTCATCGATACCTACATAGATTTGCTGGAGACACGGAGGAC  
ATACTACGAGGGCCAGGGGAAGGATCTCCTTTTGGGTGGAAGGACATCA  
AGGAATGGTACGAGATGCTTATGGGACATTGTACATATTTCCGGAGGAG  
CTCAGGAGCGTCAAGTACGCCTACAATGCCGACCTGTACAATGCCCTCAA  
TGACCTCAATAACCTCGTGATTACCAGGGACGAGAACGAGAAGCTGGAGT  
ACTATGAAAAGTTCCAGATTATCGAGAATGTGTTTAAGCAGAAGAAGAAG  
CCGACACTTAAGCAGATTGCAAAGGAAATCCTCGTGAATGAGGAAGATAT  
CAAGGGATACAGAGTGACAAGTACAGGCAAGCCCGAGTTCACAAATCTG  
AAGGTGTACCACGATATTAAGGACATAACCGCACGAAAGGAGATAATCG  
AAAACGCTGAGCTCCTCGATCAGATCGCAAAAATTCTTACCATCTACCAG  
TCTAGTGAGGACATTCAGGAGGAACTGACTAATCTGAACAGTGAGCTCAC  
CCAAGAGGAAATTGAGCAGATTTCAAACCTGAAAGGCTACACCGGGACG  
CACAATCTGAGCCTCAAAGCAATCAACCTCATTCTGGATGAACTTTGGCA  
CACAATGACAACCAAATTGCCATATTCAACCGCCTGAAACTGGTGCCAA  
AAAAAGTGGATCTGTCACAGCAAAAGGAAATCCCTACAACCTTGGTTGAC  
GATTTTATTCTGTCCCCCGTTGTCAAGCGGAGCTTCATCCAGTCAATCAAG  
GTGATCAATGCCATCATTAAAAAATACGGATTGCCAAACGATATAATTAT

CGAGCTTGCACGAGAGAAGAAGCTCAAAGGACGCCAGAAAGATGATTAAC  
GAAATGCAGAAGCGCAACCGCCAGACAAACGAACGCATAGAGGAAATTA  
TAAGAACAACCGGCAAAGAGAATGCCAAGTATCTGATCGAGAAAATCAA  
GCTGCACGACATGCAAGAAGGCAAGTGCCTGTACTCTCTGGAAGCTATCC  
CACTCGAAGATCTGCTGAATAATCCATTCAATTACGAGGTGGACCACATC  
ATCCCTAGATCCGTAAGCTTTGACAATTCCTTCAATAACAAAGTTCTGGTT  
AAACAGGAGGAAAATTCTAAAAAAGGGAACCGGACCCCGTTCCAGTACC  
TGAGCTCCAGTGACAGCAAGATTAGCTACGAGACTTTTAAGAAACATATT  
CTGAATCTGGCCAAAGGCAAAGGCAGGATCAGCAAGACCAAGAAGGAGT  
ACCTCCTCGAAGAACGCGACATTAACAGATTTAGTGTGCAGAAAGATTTT  
ATCAACCGAAACCTTGTCGATACTCGGTACGCCACGAGAGGCCTGATGAA  
TCTCCTCAGGAGCTACTTCCGCGTCAATAATCTGGACGTTAAAGTCAAGA  
GCATAAATGGGGGATTCACCAGCTTTCTGAGGAGAAAGTGGAAGTTTAAG  
AAGGAACGAAACAAAGGATACAAGCACCATGCTGAGGATGCTTTGATCA  
TCGCTAACGCGGACTTTATCTTTAAGGAATGGAAAAGCTGGATAAGGCA  
AAGAAAGTGATGGAAAACCAGATGTTTCGAGGAGAAGCAGGCAGAGTCAA  
TGCTGAGATCGAGACAGAGCAGGAATACAAGGAAATTTTCATCACCCCT  
CATCAGATTAACACATAAAGGACTTCAAAGACTATAAATACTCTCATAG  
GGTGGACAAAAAACCAATCGCAAGCTCATTAAATGACACCCTGTACTCAA  
CACGGAAGGATGATAAAGGTAATACCTTGATTGTGAATAATCTTAATGGA  
TTGTATGACAAAGATAACGACAAGCTCAAGAAGCTGATCAACAAGTCTCC  
AGAGAAGCTCCTTATGTATCACACGACCCACAGACTTATCAGAAATTGA  
AACTGATCATGGAGCAATACGGGGATGAGAAGAACCCACTCTACAAATAT  
TATGAGGAAACAGGTAATTACCTGACCAAGTACTCCAAGAAGGATAACG  
GACCAGTGATCAAAAAGATAAAGTACTATGGCAACAACTTAATGCGCAT  
TTGGACATAACTGACGATTACCCCAATTCGAAACAAGGTTGTGAAGCT  
CTCCCTGAAGCCTTATAGATTTGACGTGTACCTGGATAATGGGGTTTATAA  
ATTCGTCACCGTGAAAAATCTGGACGTGATCAAAAAGGAGAACTATTATG  
AAGTAAACTCAAAGTGCTATGAGGAGGCGAAGAAGCTGAAGAAGATCTC  
CAATCAGGCCGAGTTCATCGCTTCCTTCTATAAGAACGATCTCATCAAGAT  
CAATGGAGAGCTTTATCGCGTCATTGGTGTGAACAATGACTTGCTGAACA  
GGATCGAAGTCAATATGATAGACATTACCTACCGGGAGTATCTCGAAAAC  
ATGAATGATAAACGGCCGCCTCACATCATCAAGACAATCGCATCTAAAAC  
TCAGTCAATAAAAAAGTACTCTACCGATATCCTGGGGAATCTCTATGAAG  
TGAAGTCAAAGAAGCACCCACAAATCATTAAAAAAGGTGGATCCCCCAA  
GAAGAAGAGGAAAGTCTCGAGCGACTACAAAGACCATGACGGTGATTAT  
AAAGATCATGACATCGATTACAAGGATGACGATGACAAGTCTGGTGGTTC  
TACTAATCTGTCAGATATTATTGAAAAGGAGACCGGTAAGCAACTGGTTA  
TCCAGGAATCCATCCTCATGCTCCCAGAGGAGGTGGAAGAAGTCATTGGG  
ACAAGCCGGAAAGCGATATACTCGTGCACACCGCCTACGACGAGAGCA  
CCGACGAGAATGTCATGCTTCTGACTAGCGACGCCCTGAATACAAGCCT  
TGGGCTCTGGTCATACAGGATAGCAACGGTGAGAACAAGATTAAGATGCT  
CTCTGGTGGTTCTCCCAAGAAGAAGAGGAAAGTCTAA

1×GCN4-xCas9

**ATGGGACCCAAGAAAAACGCAAGGTGGAAGATCCTAAGAAAAAGCGG  
AAAGTGGACGGCATTGGTAGTGGGAGCAACGGCAGCAGCGGAGAGGAAC  
TGCTGAGCAAGAACTACCACCTGGAAAACGAGGTGGCCAGACTGAAGAA  
AGGCTCTGGCTCTGGCGGAAGCGGTTCTGGCGGATCAGGATCTGGAAGTG  
GCGGCGACAAGAAGTACTCCATTGGGCTCGCTATCGGCACAAACAGCGTC  
GGCTGGGCCGTCATTACGGACGAGTACAAGGTGCCGAGCAAAAAATTCA  
AAGTTCTGGGCAATACCGATCGCCACAGCATAAAGAAGAACCTCATTGGC  
GCCCTCCTGTTCGACTCCGGGGAGACGGCCGAAGCCACGCGGCTCAAAAG  
AACAGCACGGCGCAGATATACCCGCAGAAAGAATCGGATCTGCTACCTGC  
AGGAGATCTTTAGTAATGAGATGGCTAAGGTGGATGACTCTTTCTTCCATA  
GGCTGGAGGAGTCCTTTTTTGGTGGAGGAGGATAAAAAGCACGAGCGCCA  
CCCAATCTTTGGCAATATCGTGGACGAGGTGGCGTACCATGAAAAGTACC  
CAACCATATATCATCTGAGGAAGAAGCTTGTAGACAGTACTGATAAGGCT  
GACTTGCGGTTGATCTATCTCGCGCTGGCGCATATGATCAAATTTGCGGGA  
CACTTCTCATCGAGGGGGACCTGAACCCAGACAACAGCGATGTCGACAA  
ACTCTTTATCCAACCTGGTTCAGACTTACAATCAGCTTTTTCGAAGAGAACC  
GATCAACGCATCCGGAGTTGACGCCAAAGCAATCCTGAGCGCTAGGCTGT  
CCAAATCCCGGCGGCTCGAAAACCTCATCGCACAGCTCCCTGGGGAGAAG  
AAGAACGGCCTGTTTGGTAATCTTATCGCCCTGTCCCTCGGGCTGACCCCC  
AACTTTAAATCTAACTTCGACCTGGCCGAAGATACCAAGCTTCAACTGAG  
CAAAGACACCTACGATGATGATCTCGACAATCTGCTGGCCCAGATCGGCG  
ACCAGTACGCAGACCTTTTTTTGGCGGCAAGAACCTGTCAGACGCCATT  
CTGCTGAGTGATATTCTGCGAGTGAACACGGAGATCACCAAAGCTCCGCT  
GAGCGCTAGTATGATCAAGCTCTATGATGAGCACCACCAAGACTTGACTT  
TGCTGAAGGCCCTTGTGAGACAGCAACTGCCTGAGAAGTACAAGGAAATT  
TTCTTCGATCAGTCTAAAAATGGCTACGCCGGATACATTGACGGCGGAGC  
AAGCCAGGAGGAATTTTACAAATTTATTAAGCCCATCTTGAAAAAATGG  
ACGGCACCGAGGAGCTGCTGGTAAAGCTTAACAGAGAAGATCTGTTGCGC  
AAACAGCGCACTTTCGACAATGGAATCATCCCCACCAGATTCACCTGGG  
CGAACTGCACGCTATCCTCAGGCGGCAAGAGGATTTCTACCCCTTTTTGAA  
AGATAACAGGGAAAAGATTGAGAAAATCCTCACATTTCCGATACCCTACT  
ATGTAGGCCCCCTCGCCCGGGGAAATTCCAGATTCGCGTGGATGACTCGC  
AAATCAGAAGAGACCATCACTCCCTGGAACCTTCGAGAAAGTCGTGGATAA  
GGGGGCCTCTGCCCAGTCCTTCATCGAAAGGATGACTAACTTTGATAAAA  
ATCTGCCTAACGAAAAGGTGCTTCCTAAACACTCTCTGCTGTACGAGTACT  
TCACAGTTTATAACGAGCTACCAAGGTCAAATACGTCACAGAAGGGATG  
AGAAAGCCAGCATTCTGTCTGGAGATCAGAAGAAAGCTATTGTGGACCT  
CCTCTTCAAGACGAACCGGAAAGTTACCGTGAAACAGCTCAAAGAAGACT  
ATTTCAAAAAGATTGAATGTTTCGACTCTGTTGAAATCAGCGGAGTGGAG  
GATCGCTTCAACGCATCCCTGGGAACGTATCACGATCTCCTGAAAATCATT  
AAAGACAAGGACTTCCTGGACAATGAGGAGAACGAGGACATTCTTGAGG  
ACATTGTCCTACCCTTACGTTGTTTGAAGATAGGGAGATGATTGAAGAA  
CGCTTGAAAACCTTACGCTCATCTCTTCGACGACAAAGTCATGAAGCAGCT**

CAAGAGGCGCCGATATACAGGATGGGGGCGGCTGTCAAGAAAAGTATC  
AATGGGATCCGAGACAAGCAGAGTGGAAAGACAATCCTGGATTTTCTTAA  
GTCCGATGGATTTGCCAACCGGAACTTCATTCAGTTGATCCATGATGACTC  
TCTCACCTTTAAGGAGGACATCCAGAAAGCACAAGTTTCTGGCCAGGGGG  
ACAGTCTTCACGAGCACATCGCTAATCTTGCAGGTAGCCCAGCTATCAA  
AAGGGAATACTGCAGACCGTTAAGGTCGTGGATGAACTCGTCAAAGTAAT  
GGGAAGGCATAAGCCCAGAGAAATATCGTTATCGAGATGGCCCCGAGAGAAC  
CAAACCACCCAGAAGGGACAGAAGAACAGTAGGGAAAGGATGAAGAGG  
ATTGAAGAGGGTATAAAAGAACTGGGGTCCCAAATCCTTAAGGAACACCC  
AGTTGAAAACACCCAGCTTCAGAATGAGAAGCTCTACCTGTACTACCTGC  
AGAACGGCAGGGACATGTACGTGGATCAGGAACTGGACATCAATCGGCT  
CTCCGACTACGACGTGGATCATATCGTGCCCCAGTCTTTTCTCAAAGATGA  
TTCTATTGATAATAAAGTGTTGACAAGATCCGATAAAAAACAGAGGGAAGA  
GTGATAACGTCCCCTCAGAAGAAGTTGTCAAGAAAATGAAAAATTATTGG  
CGGCAGCTGCTGAACGCCAAACTGATCACACAACGGAAGTTTCGATAATCT  
GACTAAGGCTGAACGAGGTGGCCTGTCTGAGTTGGATAAAGCCGGTTTCA  
TCAAAGGCAGCTTGTTGAGACACGCCAGATCACCAAGCACGTGGCCCAA  
ATTCTCGATTCACGCATGAACACCAAGTACGATGAAAATGACAAACTGAT  
TCGAGAGGTGAAAGTTATTACTCTGAAGTCTAAGCTGGTCTCAGATTTAG  
AAAGGACTTTCAGTTTATAAAGGTGAGAGAGATCAACAATTACCACCATG  
CGCATGATGCCTACCTGAATGCAGTGGTAGGCACTGCACTTATCAAAAAA  
TATCCCAAGCTTGAATCTGAATTTGTTTACGGAGACTATAAAGTGTACGAT  
GTTAGGAAAATGATCGCAAAGTCTGAGCAGGAAATAGGCAAGGCCACCG  
CTAAGTACTTCTTTTACAGCAATATTATGAATTTTTTCAAGACCGAGATTA  
CACTGGCCAATGGAGAGATTCGGAAGCGACCACTTATCGAAACAAACGG  
AGAAACAGGAGAAATCGTGTGGGACAAGGGTAGGGATTTTCGCGACAGTC  
CGGAAGGTCCTGTCCATGCCGCAGGTGAACATCGTTAAAAAGACCGAAGT  
ACAGACCGGAGGCTTCTCCAAGGAAAGTATCCTCCCGAAAAGGAACAGC  
GACAAGCTGATCGCACGCAAAAAAGATTGGGACCCCAAGAAATACGGCG  
GATTCGATTCTCTACAGTCGTTACAGTGTACTGGTTGTGGCTAAAGTGG  
AGAAAGGGAAGTCTAAAAAACTCAAAGCGTCAAGGAACTGCTGGGCAT  
CACAATCATGGAGCGATCAAGCTTCGAAAAAAACCCCATCGACTTTCTCG  
AGGCGAAAGGATATAAAGAGGTCAAAAAAGACCTCATTAAGCTTCCC  
AAGTACTCTCTTTGAGCTTGAAAACGGCCGGAAACGAATGCTCGCTAG  
TGCGGGCGTGCTGCAGAAAGGTAACGAGCTGGCACTGCCCTCTAAATACG  
TTAATTTCTTGTATCTGGCCAGCCACTATGAAAAGCTCAAAGGGTCTCCCG  
AAGATAATGAGCAGAAGCAGCTGTTCTGTGGAACAACACAAACTACCTT  
GATGAGATCATCGAGCAAATAAGCGAATTCTCCAAAAGAGTGATCCTCGC  
CGACGCTAACCTCGATAAGGTGCTTTCTGCTTACAATAAGCACAGGGATA  
AGCCCATCAGGGAGCAGGCAGAAAACATTATCCACTTGTTTACTCTGACC  
AACTTGGGCGCGCCTGCAGCCTTCAAGTACTTCGACACTACCATAGACAG  
AAAGCGGTACACCTCTACAAAGGAGGTCTGGACGCCACACTGATTCATC  
AGTCAATTACGGGGCTCTATGAAACAAGAATCGACCTCTCTCAGCTCGGT  
GGAGACGAGGGAGCTGATAAGCGCACCGCGATGGTTCCGAGTTCGAAA



GCCCCAAGAAGAAGAGGAAAGTCTAA

pCMV-ABE-scFv

**ATG**CACCAAAGAAGAAGCGGAAAGTCTCTGAAGTCGAGTTTAGCCACGA  
GTATTGGATGAGGCACGCACTGACCCTGGCAAAGCGAGCATGGGATGAA  
AGAGAAGTCCCCGTGGGCGCCGTGCTGGTGCAACAATAGAGTGATCGG  
AGAGGGATGGAACAGGCCAATCGGCCGCCACGACCCTACCGCACACGCA  
GAGATCATGGCACTGAGGCAGGGAGGCCTGGTCATGCAGAATTACCGCCT  
GATCGATGCCACCCTGTATGTGACACTGGAGCCATGCGTGATGTGCGCAG  
GAGCAATGATCCACAGCAGGATCGGAAGAGTGGTGTTCGGAGCACGGGA  
CGCCAAGACCGGCGCAGCAGGCTCCCTGATGGATGTGCTGCACCACCCCG  
GCATGAACCACCGGGTGGAGATCACAGAGGGAATCCTGGCAGACGAGTG  
CGCCGCCCTGCTGAGCGATTTCTTTAGAATGCGGAGACAGGAGATCAAGG  
CCCAGAAGAAGGCACAGAGCTCCACCGACTCTGGAGGATCTAGCGGAGG  
ATCCTCTGGAAGCGAGACACCAGGCACAAGCGAGTCCGCCACACCAGAG  
AGCTCCGGCGGCTCCTCCGGAGGATCCTCTGAGGTGGAGTTTTCCACGA  
GTACTGGATGAGACATGCCCTGACCCTGGCCAAGAGGGCACGCGATGAG  
AGGGAGGTGCCTGTGGGAGCCGTGCTGGTGCTGAACAATAGAGTGATCGG  
CGAGGGCTGGAACAGAGCCATCGGCCTGCACGACCCAACAGCCCATGCC  
GAAATTATGGCCCTGAGACAGGGCGGCCTGGTCATGCAGAACTACAGACT  
GATTGACGCCACCCTGTACGTGACATTCGAGCCTTGCGTGATGTGCGCCG  
GCGCCATGATCCACTCTAGGATCGGCCGCGTGGTGTTCGGCGTGAGGAAC  
GCAAAAACCGGCGCCGCAGGCTCCCTGATGGACGTGCTGCACTACCCCGG  
CATGAATCACCGCGTCGAAATTACCGAGGGAATCCTGGCAGATGAATGTG  
CCGCCCTGCTGTGCTATTTCTTTCGGATGCCTAGACAGGTGTTCAATGCTC  
AGAAGAAGGCCAGAGCTCCACCGACTCCGGAGGATCTAGCGGAGGCTC  
CTCTGGCTCTGAGACACCTGGCACAAGCGAGAGCGCAACACCTGAAAGCT  
CCGGAGGATCTAGCGGAGGCTCCTCTGGTGGTTCTTCTGGTGGTTCTAGCG  
GGGGCAGCAGCGGGGGTCAATGGGTCCCGACATCGTGATGACCCAGAG  
CCCAGCAGCCTGAGCGCCAGCGTGGGCGACCGCGTGACCATCACCTGCC  
GCAGCAGCACC GGCGCCGTGACCACCAGCAACTACGCCAGCTGGGTGCA  
GGAGAAGCCCGGCAAGCTGTTCAAGGGCCTGATCGGCGGCACCAACAAC  
CGCGCCCCCGGCGTGCCAGCCGCTTCAGCGGCAGCCTGATCGGCGACAA  
GGCCACCCTGACCATCAGCAGCCTGCAGCCCAGGACTTCGCCACCTACT  
TCTGCGCCCTGTGGTACAGCAACCACTGGGTGTTTCGGCCAGGGCACCAAG  
GTGGAGCTGAAGCGCGGCGGCGGCAGCGGCGGCGGCGGCAGCGGCG  
GCGGCGGCAGCAGCGGCGGCGGCAGCGAGGTGAAGCTGCTGGAGAGCGG  
CGGCGGCCTGGTGCAGCCCGGCGGCAGCCTGAAGCTGAGCTGCGCCGTGA  
GCGGCTTCAGCCTGACCGACTACGGCGTGA ACTGGGTGCGCCAGGCCCCC  
GGCCGCGGCCTGGAGTGGATCGGCGTGATCTGGGGCGACGGCATCACCGA  
CTACAACAGCGCCCTGAAGGACCGCTTCATCATCAGCAAGGACAACGGCA  
AGAACACCGTGTACCTGCAGATGAGCAAGGTGCGCAGCGACGACACCGC  
CCTGTACTACTGCGTGACCGGCTGTTCGACTACTGGGGCCAGGGCACCC  
TGGTGACCGTGAGCAGCTACCCATACGATGTTCCAGATTACGCTGGTTCTG

GCGGCTCAAAAAGAACCGCCGACGGCAGCGAATTCGAGCCCAAGAAGAA  
GAGGAAAGTCTAA

pVax-PAH-WT

**ATG**TCCACTGCGGTCCTGGAAAACCCAGGCTTGGGCAGGAAACTCTCTGA  
CTTTGGACAGGAAACAAGCTATATTGAAGACAACCTGCAATCAAAATGGTG  
CCATATCACTGATCTTCTCACTCAAAGAAGAAGTTGGTGCATTGGCCAAA  
GTATTGCGCTTATTTGAGGAGAATGATGTAAACCTGACCCACATTGAATCT  
AGACCTTCTCGTTTAAAGAAAGATGAGTATGAATTTTTACCCATTTGGAT  
AAACGTAGCCTGCCTGCTCTGACAAACATCATCAAGATCTTGAGGCATGA  
CATTGGTGCCACTGTCCATGAGCTTTCACGAGATAAGAAGAAAGACACAG  
TGCCCTGGTTCCCAAGAACCATTCAAGAGCTGGACAGATTTGCCAATCAG  
ATTCTCAGCTATGGAGCGGAACTGGATGCTGACCACCCTGGTTTTAAAGA  
TCCTGTGTACCGTGCAAGACGGAAGCAGTTTGCTGACATTGCCTACAACCT  
ACCGCCATGGGCAGCCCATCCCTCGAGTGAATACATGGAGGAAGAAAA  
GAAAACATGGGGCACAGTGTTC AAGACTCTGAAGTCCTTGTATAAAACCC  
ATGCTTGCTATGAGTACAATCACATTTTTCCACTTCTTGAAAAGTACTGTG  
GCTTCCATGAAGATAACATTCCCCAGCTGGAAGACGTTTCTCAATTCCTGC  
AGACTTGCACTGGTTTCCGCCTCCGACCTGTGGCTGGCCTGCTTTCCTCTC  
GGGATTTCTTGGGTGGCCTGGCCTTCCGAGTCTTCCACTGCACACAGTACA  
TCAGACATGGATCCAAGCCCATGTATACCCCGAACCTGACATCTGCCAT  
GAGCTGTTGGGACATGTGCCCTTGTTTTCAGATCGCAGCTTTGCCCAGTTT  
TCCCAGGAAATTGGCCTTGCCTCTCTGGGTGCACCTGATGAATACATTGAA  
AAGCTCGCCACAATTTACTGGTTTACTGTGGAGTTTGGGCTCTGCAAACAA  
GGAGACTCCATAAAGGCATATGGTGCTGGGCTCCTGTCATCCTTTGGTGA  
ATTACAGTACTGCTTATCAGAGAAGCCAAAGCTTCTCCCCCTGGAGCTGG  
AGAAGACAGCCATCCAAAATTACACTGTCACGGAGTTCCAGCCCCTGTAT  
TACGTGGCAGAGAGTTTTAATGATGCCAAGGAGAAAGTAAGGAACTTTGC  
TGCCACAATACTCGGCCCTTCTCAGTTCGCTACGACCATAACCCAAAG  
GATTGAGGTCTTGGACAATACCAGCAGCTTAAGATTTTGGCTGATTCCAT  
TAACAGTGAAATTGGAATCCTTTGCAGTGCCCTCCAGAAAATAAAGTAA

pVax-PAH-H264Y

**ATG**TCCACTGCGGTCCTGGAAAACCCAGGCTTGGGCAGGAAACTCTCTGA  
CTTTGGACAGGAAACAAGCTATATTGAAGACAACCTGCAATCAAAATGGTG  
CCATATCACTGATCTTCTCACTCAAAGAAGAAGTTGGTGCATTGGCCAAA  
GTATTGCGCTTATTTGAGGAGAATGATGTAAACCTGACCCACATTGAATCT  
AGACCTTCTCGTTTAAAGAAAGATGAGTATGAATTTTTACCCATTTGGAT  
AAACGTAGCCTGCCTGCTCTGACAAACATCATCAAGATCTTGAGGCATGA  
CATTGGTGCCACTGTCCATGAGCTTTCACGAGATAAGAAGAAAGACACAG  
TGCCCTGGTTCCCAAGAACCATTCAAGAGCTGGACAGATTTGCCAATCAG  
ATTCTCAGCTATGGAGCGGAACTGGATGCTGACCACCCTGGTTTTAAAGA  
TCCTGTGTACCGTGCAAGACGGAAGCAGTTTGCTGACATTGCCTACAACCT  
ACCGCCATGGGCAGCCCATCCCTCGAGTGAATACATGGAGGAAGAAAA

GAAAACATGGGGCACAGTGTTCAAGACTCTGAAGTCCTTGTATAAAACCC  
ATGCTTGCTATGAGTACAATCACATTTTTCCACTTCTTGAAAAGTACTGTG  
GCTTCCATGAAGATAACATTCGCCAGCTGGAAGACGTTTCTCAATTCCTGC  
AGACTTGCAGTGGTTTCCGCCTCCGACCTGTGGCTGGCCTGCTTTCCTCTC  
GGGATTTCTTGGGTGGCCTGGCCTTCCGAGTCTTCTACTGCACACAGTACA  
TCAGACATGGATCCAAGCCCATGTATACCCCCGAACCTGACATCTGCCAT  
GAGCTGTTGGGACATGTGCCCTTGTTTTTCAGATCGCAGCTTTGCCAGTTT  
TCCCAGGAAATTGGCCTTGCCTCTCTGGGTGCACCTGATGAATACATTGAA  
AAGCTCGCCACAATTTACTGGTTTACTGTGGAGTTTGGGCTCTGCAAACAA  
GGAGACTCCATAAAGGCATATGGTGCTGGGCTCCTGTCATCCTTTGGTGA  
ATTACAGTACTGCTTATCAGAGAAGCCAAAGCTTCTCCCCCTGGAGCTGG  
AGAAGACAGCCATCCAAAATTACACTGTCACGGAGTTCCAGCCCCTGTAT  
TACGTGGCAGAGAGTTTTAATGATGCCAAGGAGAAAGTAAGGAACTTTGC  
TGCCACAATACCTCGGCCCTTCTCAGTTCGCTACGACCCATACACCCAAAG  
GATTGAGGTCTTGGACAATACCCAGCAGCTTAAGATTTTGGCTGATTCCAT  
TAACAGTGAAATTGGAATCCTTTGCAGTGCCCTCCAGAAAATAAAGTAA
